# Supplementary material
Source: PubMed Central journal article supplement (PMC3589149)
Supplement: mt2012249x5.pdf [file mt2012249x5.pdf]

# Table S1

**Table S1.** Primers applied for integration specific PCR and RT-PCR

| Vector | Name | Gene     | Vector orientation to gene | Vector primers (RT-PCR/semi-nested) | integration specific primer | Exon fw primer (upstream of integrationsite) | Exon rev primer (downstream of integrationsite) |
|--------|------|----------|----------------------------|-------------------------------------|-----------------------------|----------------------------------------------|-------------------------------------------------|
| Alpha  | A1   | MYB      | +                          |                                     | GGGATCCCAGAGTTCTAGGCATGTG   | GTCTGAATACCCAACTGTTACAGC                     | GGCTCGCCAGGGACCTGTT                             |
|        | A2   | UBAC2    | +                          | aDWSA1 / aDWSA2                     | GGCCCAGACATTTATCCATTCCCTCC  | GCTCTTTGTGTATGACCTTCACGC                     | GATGCAGAGCACCTGATGCACC                          |
|        | A3   | MAML3    | +                          |                                     | CGTTTGTCAATTTGTACTGCTGAG    | GGACACCGTGAGCCTCTACC                         | CATCACAAGCACCATTTCTGTGGT                        |
|        | A4   | ZKSCAN2  | +                          |                                     | TGGTCCTGAGACACGTCAAAGATGTC  | TCCTACAGAAAGAGTGTGCATCAG                     | GCAGACCTAGAGTCCATGGCTCC                         |
|        | A5   | ADAMTS17 | -                          | aUPSAr1 / aUPSAr2                   | GCATGGTGGTGCATGCCTG         | GTGCTTGCCGAAGACAATGGTCTC                     | CGTTGGCACTGTAGTGCATGCC                          |
| LV     | L1   | PSMD14   | -                          | UPLVSD1 / UPLVSD2                   | GCAGCAGACTGTGAAGTTGCAGAA    | GGAAAGTTGTACCTGCCAGAATTAG                    | CTGCAGGAGCATCTGTAGGTGG                          |
|        | L2   | ZFAND2A  | -                          |                                     | TTCCCAGCCCGTGTACTTTGTC      | CCATACGCTGCACATAAGTGTCCG                     | CAGAGTGGGCATACTGGGACG                           |
|        | L3   | HNRNPR   | +                          | DWLVA1 / DWLVA2 (a)<br>and          | CCGCCAAATCCTAACATCCATTTCCC  | GGCTAATCAGGTGAATGGTAATGCGG                   | GAACTGCTGTAGTACAGACAGAGCTCC                     |
|        | L4   | ZNF655   | +                          | DWcrypSA1 /                         | ATGTGGAACACATGAGGCCAAGAG    | AGGAAGCAGCAGGGTCACCAAGG                      | CAGCTTGTCTCTTCTCTGGTCTCTCC                      |
|        | L5   | ZFR      | +                          | DWcrypSA2 (b')                      | TGCCAACCAAGCAATCCACAAC      | CAGCCTCCCAAACCACCACAG                        | GAGTCCCACGAGTAGAACTGTTC                         |

**Abbreviations:** aDWSA1: CCGACCAAAGACGTGCCTGG; aDWSA2: GGTCGTCGGGCTCACTCTCC; aUPSAr1: GGTGACCCCGACGTGATAGTTAGGG; aUPSAr2: ATAGTGGTCGGCCACAGA CGG; UPLVSD1, UPLVSD2, DWLVA1, DWLVA2, DWcrypSA1, DWcrypSA2 have been published previously by *Cesana et al. 2012*. For integration specific PCR vector specific primers were aSINfor (TCCGTGGTGTGTCGAAT) for Alpha and LVfor (TGGAAGGGCTAATCACTCCCAAC) for LV. All primers are listed in 5'-3' orientation.
