# Supplementary material
Source: PubMed Central journal article supplement (PMC3589149)
Supplement: mt2012249x6.pdf [file mt2012249x6.pdf]

# Table S2

**TableS2.** Summary of 5'RACE sequencing results.

| <b>vector</b>               | <b>counts</b> | <b>frequency<br/>of SA usage</b> |
|-----------------------------|---------------|----------------------------------|
| unique fusion transcripts   | 20            |                                  |
| SA4                         | 13            | 62% <sup>a)</sup>                |
| SA3                         | 5             | 24%                              |
| B                           | 1             | 5% <sup>a)</sup>                 |
| SA <sup>pbs</sup>           | 1             | 5% <sup>a)</sup>                 |
| LTR transcripts             | 7             |                                  |
| read-through transcripts    | 1             |                                  |
| putative fusion transcripts | 3             |                                  |
| redundant reads             | 18            |                                  |
| unspecific/ not mappable    | 15            |                                  |
| total clones/sequences      | 64            |                                  |
| <b>alpha</b> unspecific     | 6             |                                  |
| no sequence retrieved       | 8             |                                  |
| total clones/sequences      | 14            |                                  |

Nomenclature of splice acceptors according to previous publications (Cesana et al. 2012, Moiani et al. 2012). SA<sup>pbs</sup> indicates a splice acceptor that had not been described previously. <sup>a)</sup> Additionally one putative fusion transcript was identified.
