# Supplementary material
Source: PubMed Central journal article supplement (PMC3589149)
Supplement: mt2012249x7.pdf [file mt2012249x7.pdf]

# Table S3

**TableS3.** Aberrantly spliced cellular transcripts as detected by 5'RACE.

| <b>target genes:</b> | <b>no. of reads</b> | <b>putative target genes:</b> | <b>no. of reads</b> |
|----------------------|---------------------|-------------------------------|---------------------|
| EEF1G                | 7                   | SIRPB1                        | 3                   |
| STAT5B               | 5                   | ZNF251                        | 1                   |
| FAM126b              | 3                   |                               |                     |
| COBRA1               | 2                   |                               |                     |
| CHKA                 | 2                   |                               |                     |
| POLA2                | 1                   |                               |                     |
| PRPL22               | 1                   |                               |                     |
| ZNF426               | 1                   |                               |                     |
| CLCN7                | 1                   |                               |                     |
| FBX038               | 1                   |                               |                     |
| MECP2                | 1                   |                               |                     |
| COX6B1               | 1                   |                               |                     |
| GATAD2B              | 1                   |                               |                     |
| MAP4K2               | 1                   |                               |                     |
| SAPS2                | 1                   |                               |                     |
| TRABD                | 1                   |                               |                     |
| ZBTB43               | 1                   |                               |                     |
| HMHA1                | 1                   |                               |                     |
| PRMT1                | 1                   |                               |                     |
| CPSF1                | 1                   |                               |                     |
