# Supplementary material
Source: PubMed Central journal article supplement (PMC3589149)
Supplement: mt2012249x8.pdf [file mt2012249x8.pdf]

Table S4

| read# | vector/<br>sample | #   | vector specific<br>sequence length | splice site<br>used | cellular exon/ gene                                                    | Blat /UCSC(GRCh37/hg19)      | comment                                                                                                     | result                     |
|-------|-------------------|-----|------------------------------------|---------------------|------------------------------------------------------------------------|------------------------------|-------------------------------------------------------------------------------------------------------------|----------------------------|
| 1     | LV                | A01 | -                                  | -                   | -                                                                      | -                            | TOPO religated                                                                                              | -                          |
| 1     | LV                | A02 | 108                                | B                   | STAT5B; 3rd Exon                                                       | chr17:40,379,546-40,379,643  | SD matches but only 3rd Exon (60 nt 5'missing); (100% match to STAT5B; 97% to STAT5A)                       | fusion transcript          |
| 1     | LV                | A03 | 80                                 | SA4                 | POLA2; Exon 1-7                                                        | chr11:65,029,809-65,047,096  | lacks part of 1st Exon corresponding to 5'UTR                                                               | fusion transcript          |
| 1     | LV                | A04 | 78                                 | SA4                 | homolog of Pongo FAM126b; 1st Exon                                     | chr2:201,936,177-201,936,349 | SD matches; 15 nt at 5' missing                                                                             | fusion transcript          |
| 1     | LV                | A05 | -                                  | -                   | -                                                                      | -                            | both primers with 14 nt inbetween                                                                           | unspecific                 |
| 1     | LV                | A06 | -                                  | -                   | -                                                                      | -                            | TOPO religated                                                                                              | -                          |
| 1     | LV                | B01 | 80                                 | SA4                 | EEF1G; Exon 1-5                                                        | chr11:62,338,439-62,341,332  | analogue 1_F01                                                                                              | fusion transcript          |
| 1     | LV                | B02 | 78                                 | SA4                 | RPL22; 1st+2nd Exon                                                    | chr1:6,257,712-6,259,653     | 1st Exon: 26 nt at 5' missing; 2nd Exon 4 nt 5' missing; SD to LV matches                                   | fusion transcript          |
| 1     | LV                | B03 | 76                                 | SA3                 | COBRA1; Exon 1-4                                                       | chr9:140,149,981-140,151,505 | Exon 1 incomplete at 5'                                                                                     | fusion transcript          |
| 1     | LV                | B04 | 306                                | -                   | CRNDE; last intron, antisense                                          | chr16:54,953,234-54,953,354  | complete provirus including dU3                                                                             | read through               |
| 1     | LV                | B05 | 142                                | -                   | -                                                                      | -                            | ~analogue 1_D05                                                                                             | LTR transcript             |
| 1     | LV                | B06 | -                                  | -                   | -                                                                      | -                            | poor sequencing results                                                                                     | -                          |
| 1     | LV                | C01 | -                                  | -                   | -                                                                      | -                            | DWcrypSA2 sequence present, but no other LV leader sequence                                                 | unspecific                 |
| 1     | LV                | C02 | 80                                 | SA4                 | FAM126b                                                                | chr2:201,936,178-201,936,351 | analogue 1_A04                                                                                              | fusion transcript          |
| 1     | LV                | C03 | 79                                 | SA4                 | SIRPB1; 1st Exon + novel alternative(?) Exon in first annotated intron | chr20:1,599,788-1,600,655    | novel alternative(?) Exon in first annotated intron; compare 2_H06: similar but SA3                         | putative fusion transcript |
| 1     | LV                | C04 | 80                                 | SA4                 | EEF1G; Exon 1-5                                                        | chr11:62,338,439-62,341,332  | analogue 1_F01                                                                                              | fusion transcript          |
| 1     | LV                | C05 | 75                                 | SA3                 | CHKA; Exon 6-11                                                        | chr11:67,829,420-67,837,727  | premature termination of RT?                                                                                | fusion transcript          |
| 1     | LV                | C06 | 80                                 | SA4                 | ZNF426; Exon 1-5                                                       | chr19:9,643,521-9,649,290    |                                                                                                             | fusion transcript          |
| 1     | LV                | D01 | 149                                | -                   | -                                                                      | -                            | ~analogue 1_D05                                                                                             | LTR transcript             |
| 1     | LV                | D02 | 150                                | -                   | -                                                                      | -                            | ~analogue 1_D05                                                                                             | LTR transcript             |
| 1     | LV                | D03 | 80                                 | SA4                 | EEF1G; Exon 1-5                                                        | chr11:62,338,439-62,341,332  | analogue 1_F01                                                                                              | fusion transcript          |
| 1     | LV                | D04 | 81                                 | SA4                 | CLCN7; internal exon                                                   | chr16:1,509,110-1,509,146    | premature 5'RACE termination or novel transcription initiation? SD-SA4 junction fits                        | fusion transcript          |
| 1     | LV                | D05 | 138                                | -                   | -                                                                      | -                            | incomplete 5' RACE (TAR deletion?)                                                                          | LTR transcript             |
| 1     | LV                | D06 | 79                                 | SA4                 | FBX038; 1st Exon                                                       | chr5:147,763,546-147,763,602 |                                                                                                             | fusion transcript          |
| 1     | LV                | E01 | 80                                 | SA4                 | EEF1G; Exon 1-5                                                        | chr11:62,338,439-62,341,332  | analogue 1_F01                                                                                              | fusion transcript          |
| 1     | LV                | E02 | -                                  | B                   | STAT5B;3rd Exon (partial)                                              | chr17:40,379,550-40,379,643  | analogue 1_A02                                                                                              | fusion transcript          |
| 1     | LV                | E03 | 77                                 | SA4                 | MECP2; 1st+2nd Exon                                                    | chrX:153,357,644-153,363,130 |                                                                                                             | fusion transcript          |
| 1     | LV                | E04 | 77                                 | SA3                 | COX6B1; 1st+2nd Exon                                                   | chr19:36,139,241-36,142,250  |                                                                                                             | fusion transcript          |
| 1     | LV                | E05 | 81                                 | (SA4)               | 6 nt                                                                   |                              | LV leader seq. Until SA4 + 6 nt                                                                             | -                          |
| 1     | LV                | E06 | 74                                 | SA4                 | 22nt                                                                   |                              | LV leader sequence until SA4 + 22 nt (not mappable)                                                         | -                          |
| 1     | LV                | F01 | 80                                 | SA4                 | EEF1G; Exon 1-5                                                        | chr11:62,338,439-62,341,332  | =1_H05, 1_B01, 1_E01, 1_C04, 1_D03                                                                          | fusion transcript          |
| 1     | LV                | F02 | 76                                 | SA3                 | GATAD2B; 1st Exon                                                      | chr1:153,895,212-153,895,338 | lacks part of 1st Exon                                                                                      | fusion transcript          |
| 1     | LV                | F03 | 109                                | B                   | STAT5B;3rd Exon (partial)                                              | chr17:40,379,547-40,379,643  | analogue 1_A02                                                                                              | fusion transcript          |
| 1     | LV                | F04 | -                                  | -                   | ZNF426                                                                 |                              | ~analogue 1_H04; read length insufficient                                                                   | -                          |
| 1     | LV                | F05 | 59                                 | novel SA in PBS     | MAP4K2; Exon 10-12                                                     | chr11:64,567,583-64,568,363  | Exon 10 extended into intron+X                                                                              | fusion transcript          |
| 1     | LV                | F06 | 79                                 | SA4                 | SAPS2/BC000976; 1st Exon                                               | chr22:50,810,505-50,810,577  |                                                                                                             | fusion transcript          |
| 1     | LV                | G01 | -                                  | -                   | -                                                                      | -                            | no sequence retrieved                                                                                       | -                          |
| 1     | LV                | G02 | 45                                 | -                   | -                                                                      | -                            | unspecific binding of SMARTer oligo in leader sequence (SMARTer oligo residues present/not mediated by NUP) | unspecific                 |
| 1     | LV                | G03 | 80                                 | SA4                 | TRABD; Exon 2-5                                                        | chr22:50,631,489-50,633,468  | lacks 1st Exon and part of 2nd exon corresponding to 5'UTR/ 5'End homolog to bos TRABD (->Exon 1-4)         | fusion transcript          |
| 2     | LV                | G04 | 79                                 | SA4                 | ZBTB43; 1st+2nd Exon                                                   | chr9:129,567,320-129,571,194 | Exon 1 incomplete at 5'                                                                                     | fusion transcript          |
| 1     | LV                | G05 | 72                                 | SA3                 | HMHA1; Exon 4-11                                                       | chr19:1,073,525-1,078,036    | Exon 4 partial                                                                                              | fusion transcript          |
| 1     | LV                | G06 | 73                                 | SA3                 | EEF1A1; 1st Exon                                                       | chr6:74,230,723-74,230,754   | 73 bp between SA2 and Exon1 not mappable; analogue to 2_F06                                                 | -                          |
| 1     | LV                | H01 | 80                                 | SA4                 | PRMT1; Exon 1-6                                                        | chr19:50,180,528-50,185,515  | lacks part of 1st Exon corresponding to 5'UTR                                                               | fusion transcript          |
| 1     | LV                | H02 | 151                                | -                   | -                                                                      | -                            | ~analogue 1_D05                                                                                             | LTR transcript             |
| 1     | LV                | H03 | 144                                | -                   | -                                                                      | -                            | ~analogue 1_D05                                                                                             | LTR transcript             |
| 1     | LV                | H04 | -                                  | -                   | ZNF426; 1st+ 2nd Exon(partial)                                         | chr19:9,646,926-9,649,290    | read length insufficient; aligns with 1_C06                                                                 | -                          |
| 1     | LV                | H05 | 80                                 | SA4                 | EEF1G; Exon 1-5                                                        | chr11:62,338,439-62,341,332  | analogue 1_F01                                                                                              | fusion transcript          |
| 1     | LV                | H06 | 77                                 | SA4                 | CPSF1; 1st+2nd Exon                                                    | chr8:145,634,399-145,634,764 | extended 5'RACE                                                                                             | fusion transcript          |
| 2     | LV                | A05 | -                                  | -                   | -                                                                      | -                            | poor sequencing results                                                                                     | -                          |
| 2     | LV                | A06 | -                                  | -                   | SEC16A; 1st Exon                                                       | chr9:139,377,390-139,377,497 | LV to R but inbetween no sensible sequence; no proper primer binding site                                   | -                          |
| 2     | LV                | B05 | -                                  | -                   | -                                                                      | -                            | poor sequencing results                                                                                     | -                          |
| 2     | LV                | B06 | 77                                 | SA3                 | COBRA1; Exon1-4                                                        | chr9:140,149,980-140,151,504 | analogue 1_B03                                                                                              | fusion transcript          |
| 2     | LV                | C05 | 109                                | B                   | STAT5B;3rd Exon (partial)                                              | chr17:40,379,547-40,379,646  | analogue 2_D06                                                                                              | fusion transcript          |
| 2     | LV                | C06 | 76                                 | SA3                 | SIRPB1; 1st Exon + novel alternative(?) Exon in first annotated intron | chr20:1,599,788-1,600,655    | analogue 2_H06                                                                                              | fusion transcript          |
| 2     | LV                | D05 | 80                                 | SA4                 | EEF1G; Exon 1-5                                                        | chr11:62,338,438-62,341,333  | analogue 1_F01                                                                                              | fusion transcript          |
| 2     | LV                | D06 | 109                                | B                   | STAT5B;3rd Exon (partial)                                              | chr17:40,379,547-40,379,646  | analogue 1_A02                                                                                              | fusion transcript          |
| 2     | LV                | E05 | -                                  | -                   | EEF1G; partial Exon 2                                                  | -                            | compare 1_F01                                                                                               | -                          |
| 2     | LV                | E06 | 18                                 | -                   | RBM6; Exon 1+2                                                         | chr3:49,977,605-50,000,119   | Exon2+DWcrypSA2(3' 8 nt 87% complementary)                                                                  | unspecific                 |

(Table S4 continued)

|   |       |     |     |                 |                                              |                              |                                                                                     |                            |
|---|-------|-----|-----|-----------------|----------------------------------------------|------------------------------|-------------------------------------------------------------------------------------|----------------------------|
| 2 | LV    | F05 | -   | -               | CHKA; Exon 6-11                              | chr11:67,829,474-67,837,722  | read length insufficient; aligns with 1_C05                                         | -                          |
| 2 | LV    | F06 | 73  | SA3             | EEF1A1; 1st Exon                             | chr6:74,230,723-74,230,754   | 73 bp between SA2 and Exon1 not mappable; analogue to 1_G06                         | -                          |
| 2 | LV    | G05 | 68  | novel SA in PBS | ZNF251; Exon 2 + 3 + alternative exon (?)    | chr8:145,975,509-145,979,714 | putative novel Exon intron 3                                                        | putative fusion transcript |
| 2 | LV    | G06 | 80  | SA4             | FAM126b                                      | chr2:201,936,178-201,936,349 | analogue 1_A04                                                                      | fusion transcript          |
| 2 | LV    | H05 | 172 | -               | -                                            | -                            | incomplete 5' RACE/majority of U5                                                   | LTR transcript             |
| 2 | LV    | H06 | 76  | SA3             | SIRPB1; 1st Exon + novel alternative(?) Exon | chr20:1,599,788-1,600,655    | novel alternative(?) Exon in first annotated intron; compare 1_C03: similar but SA4 | putative fusion transcript |
| 2 | alpha | A01 | -   | -               | -                                            | -                            | TOPO religated                                                                      | -                          |
| 2 | alpha | A02 | -   | -               | -                                            | -                            | NUP primer only                                                                     | unspecific                 |
| 2 | alpha | B01 | -   | -               | -                                            | -                            | no sequence retrieved                                                               | -                          |
| 2 | alpha | B02 | -   | -               | -                                            | -                            | aDWSAF2 primer only                                                                 | unspecific                 |
| 2 | alpha | C01 | -   | -               | -                                            | -                            | Universal Primer long + SMARTer residues only                                       | unspecific                 |
| 2 | alpha | C02 | -   | -               | -                                            | -                            | no sequence retrieved                                                               | -                          |
| 2 | alpha | D01 | -   | -               | -                                            | -                            | no sequence retrieved                                                               | -                          |
| 2 | alpha | D02 | -   | -               | -                                            | -                            | no sequence retrieved                                                               | -                          |
| 2 | alpha | E01 | -   | -               | -                                            | -                            | no sequence retrieved                                                               | -                          |
| 2 | alpha | E02 | -   | -               | -                                            | -                            | NUP primer; no aDWSAF2 sequence                                                     | unspecific                 |
| 2 | alpha | F01 | -   | -               | -                                            | -                            | no sequence retrieved                                                               | -                          |
| 2 | alpha | F02 | -   | -               | -                                            | -                            | no sequence retrieved                                                               | -                          |
| 2 | alpha | G01 | -   | -               | -                                            | -                            | no sequence retrieved                                                               | -                          |
| 2 | alpha | H01 | -   | -               | -                                            | -                            | Universal Primer long + SMARTer residues only                                       | unspecific                 |
