# Supplementary material
Source: PubMed Central journal article supplement (PMC3589149)

Figure S1

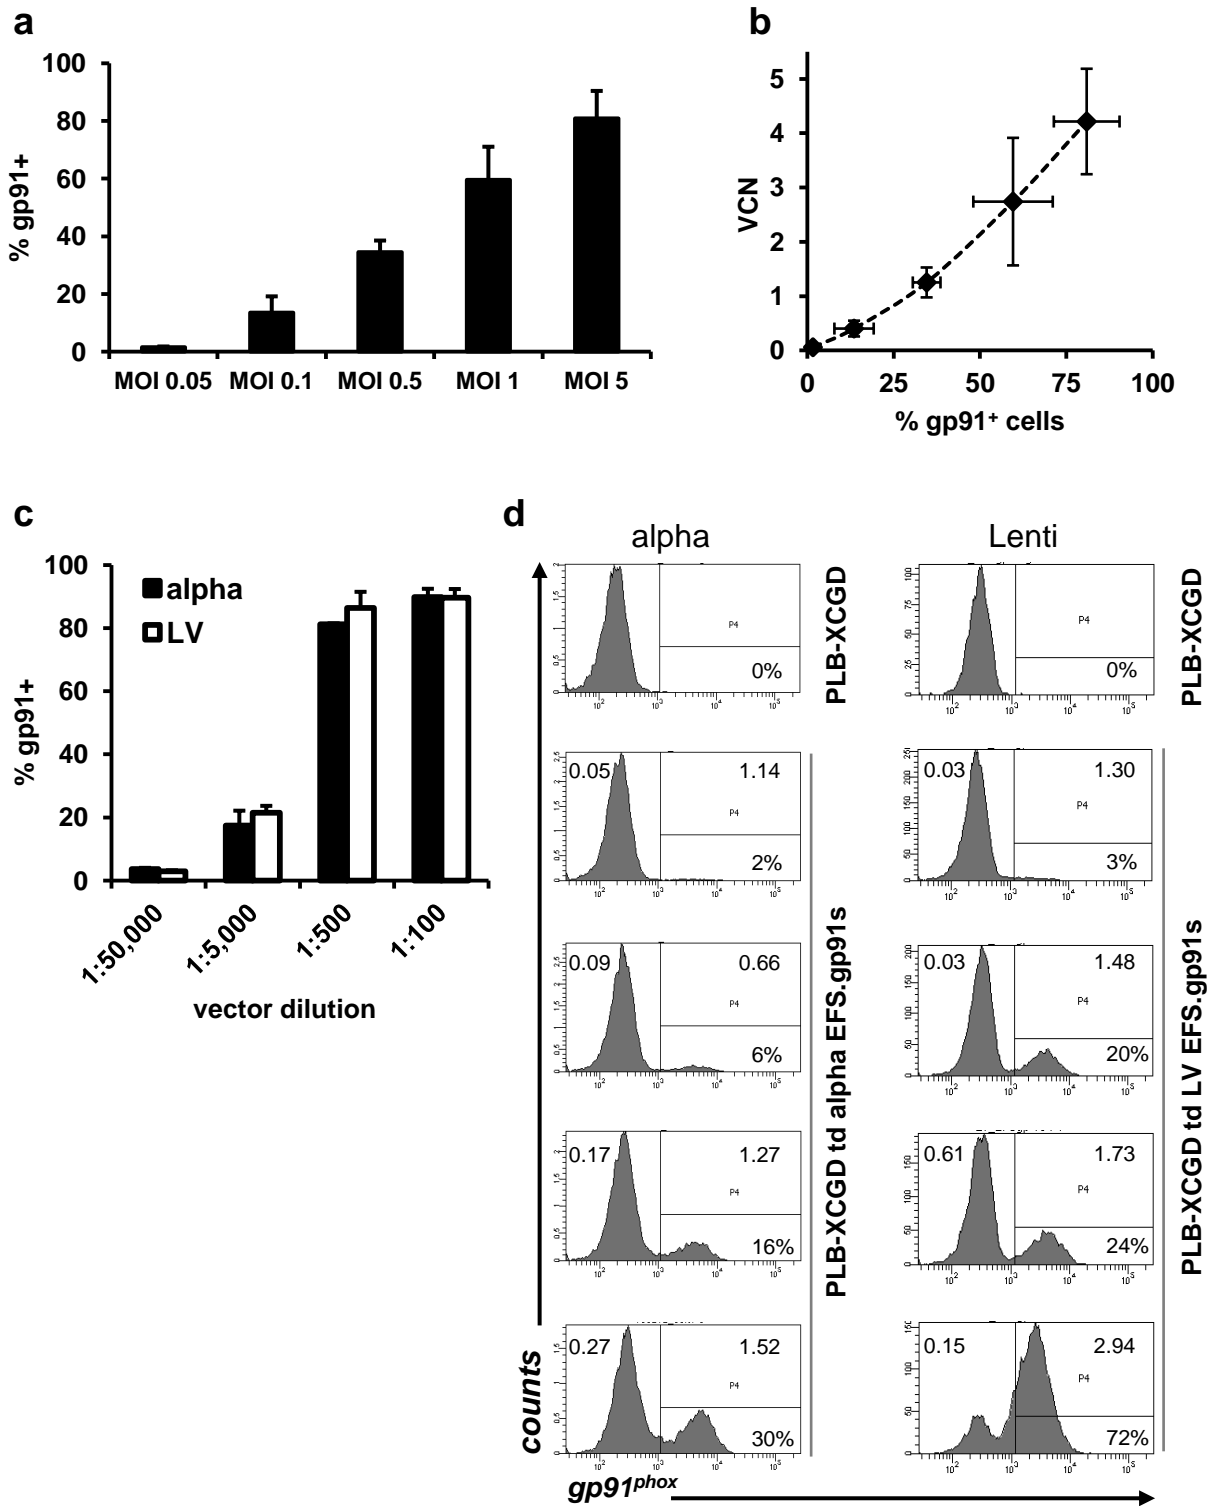

Supplement: mt2012249x1.pdf [file mt2012249x1.pdf]

Figure S2

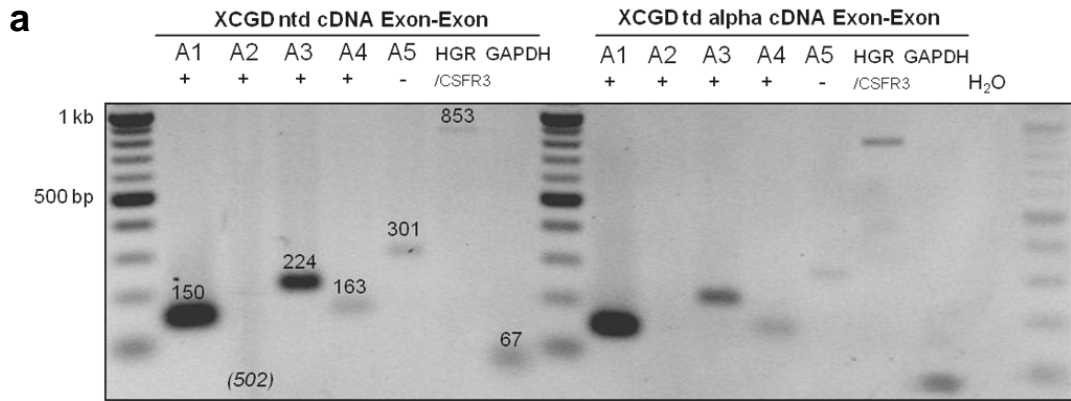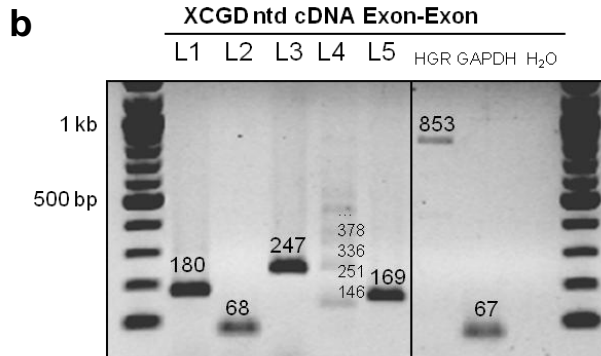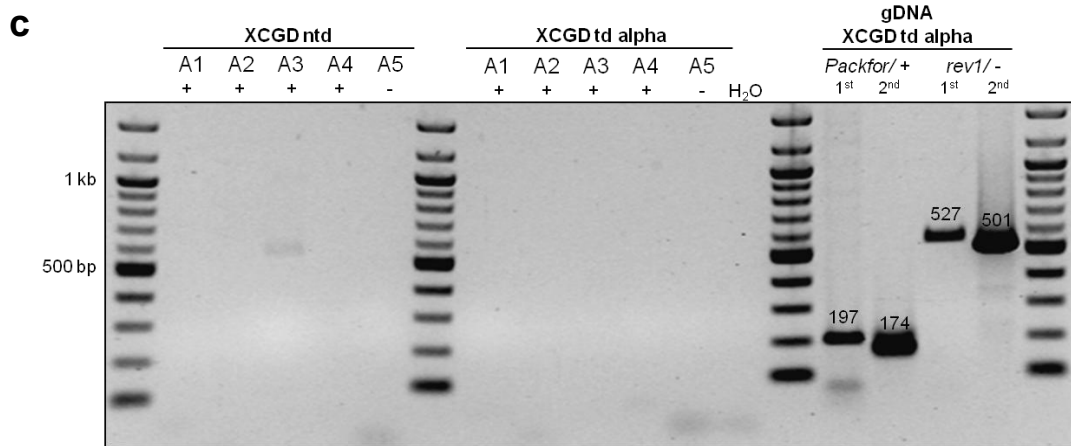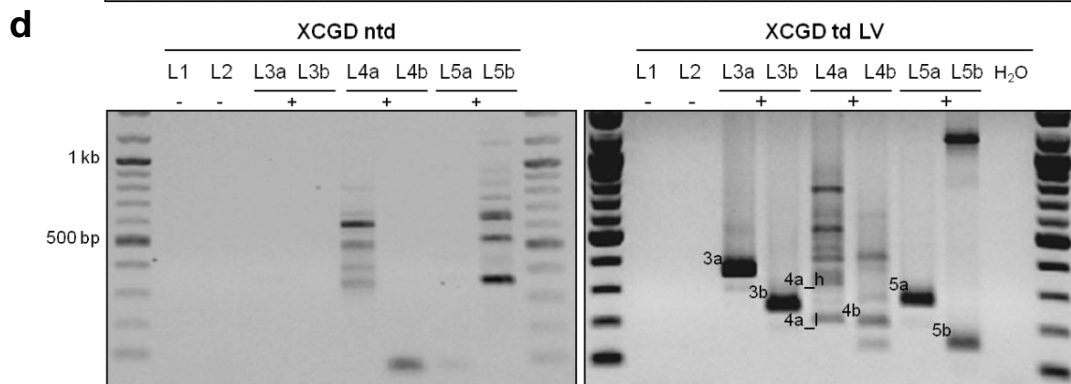

Supplement: mt2012249x2.pdf [file mt2012249x2.pdf]

Figure S3

**a**

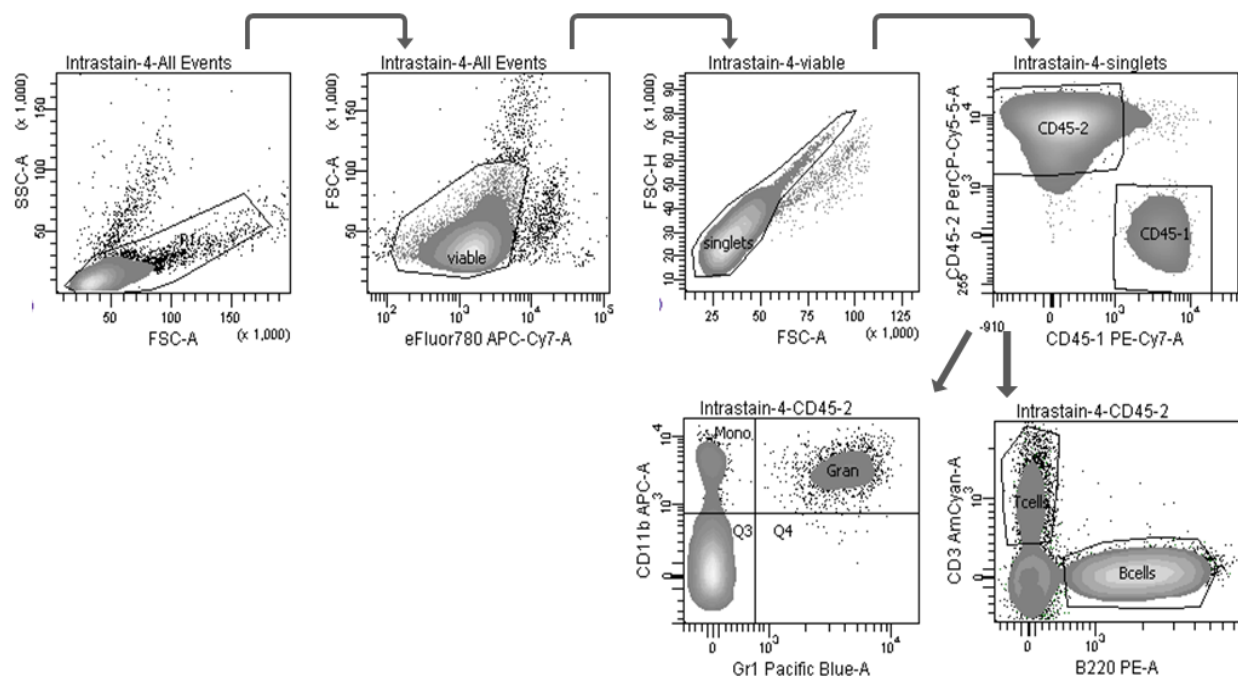

**b**

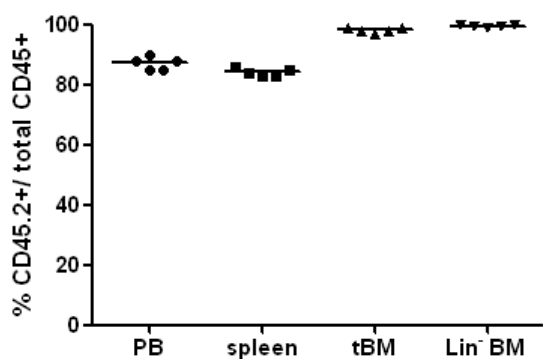

**c**

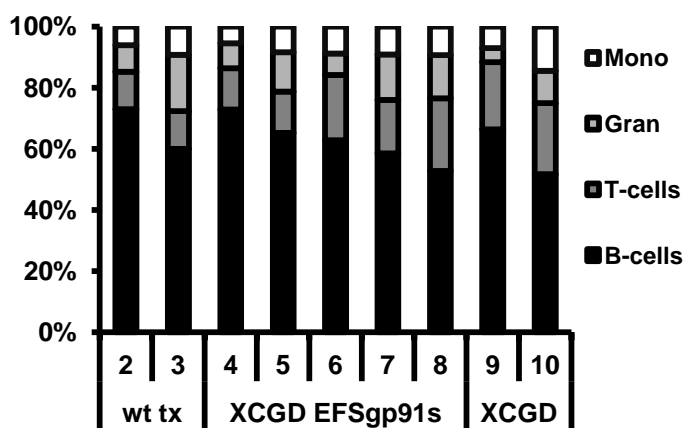

**d**

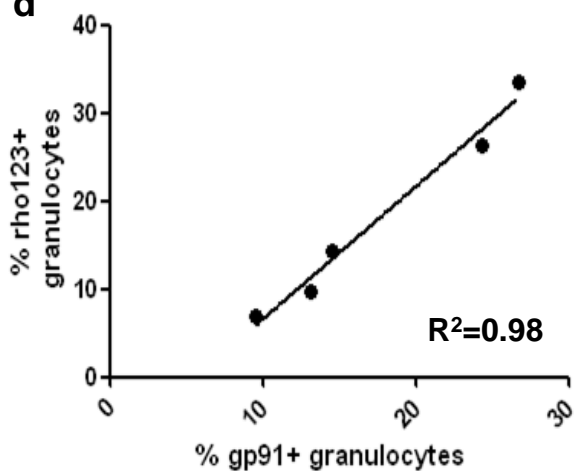

**e**

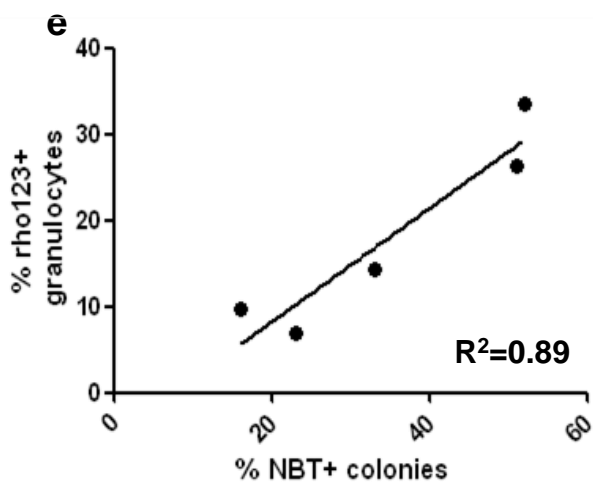

Supplement: mt2012249x3.pdf [file mt2012249x3.pdf]

Figure S4

**a**

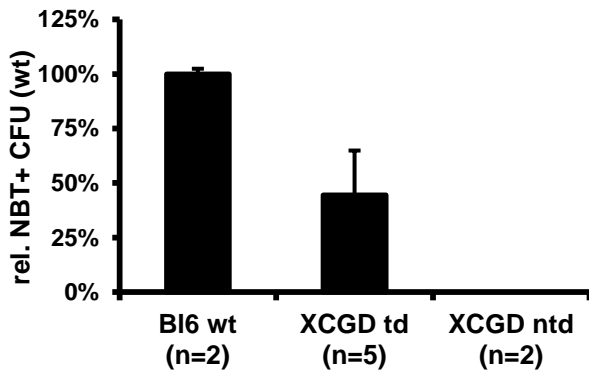

**b**

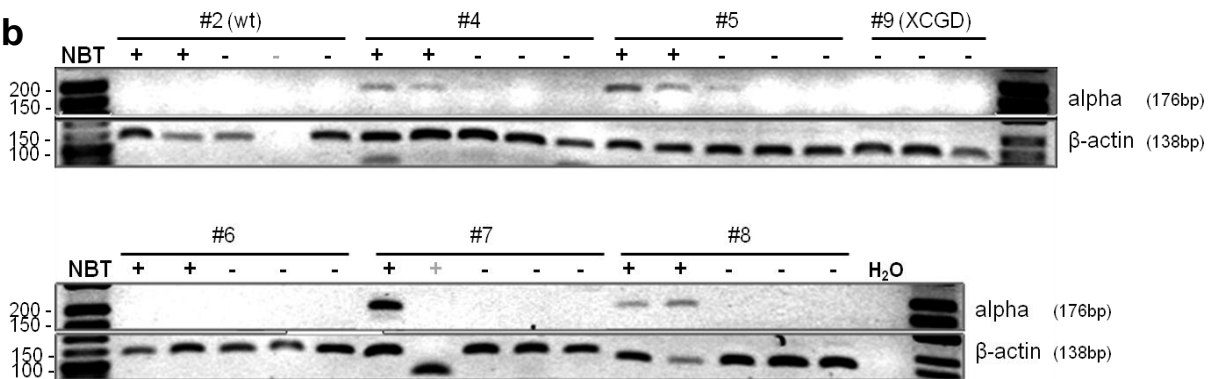

**c**

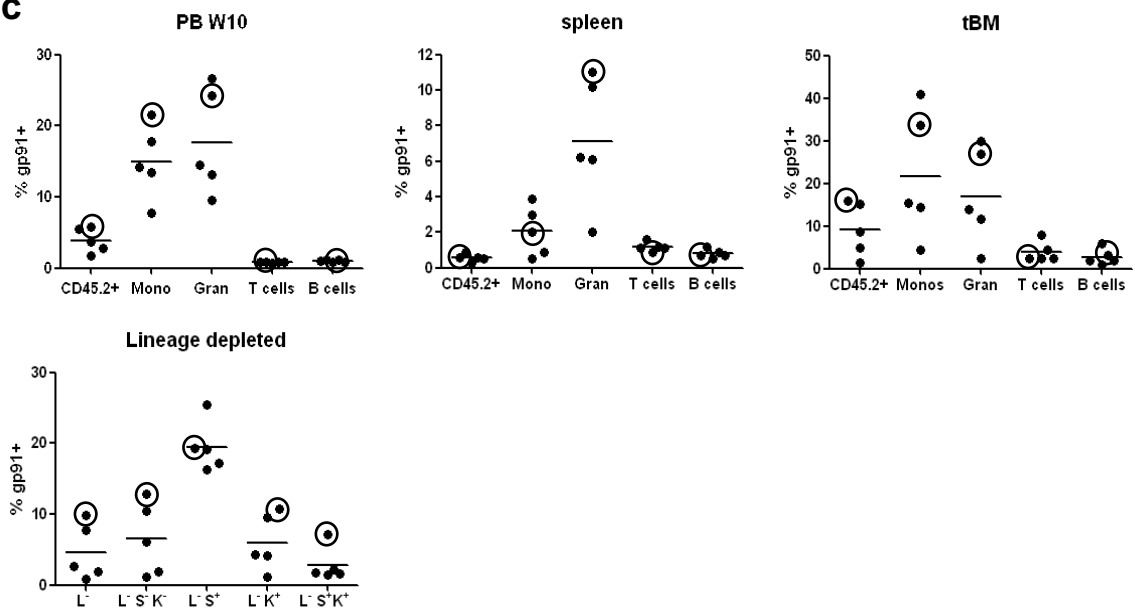

Supplement: mt2012249x4.pdf [file mt2012249x4.pdf]
